# Supplementary material for: Substantial biases in ultra-short read data sets from high-throughput DNA sequencing
Source: PubMed Central journal article supplement — Nucleic Acids Res. 2008 Jul 26;36(16):e105. doi: 10.1093/nar/gkn425 (PMC2532726; doi:10.1093/nar/gkn425), 2008-07-26

Supplementary Figure 2: Plots showing the range of simulation results in Figure 5.

a) Beta

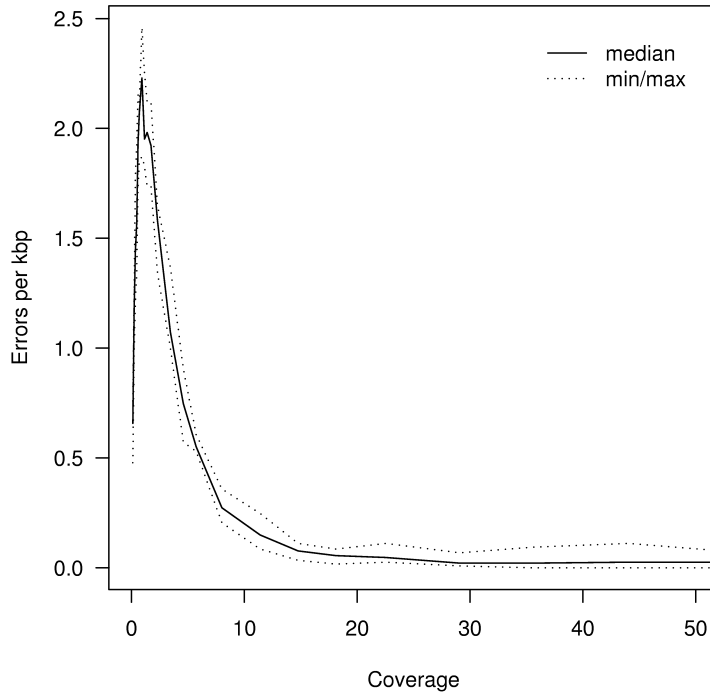

b) Helicobacter

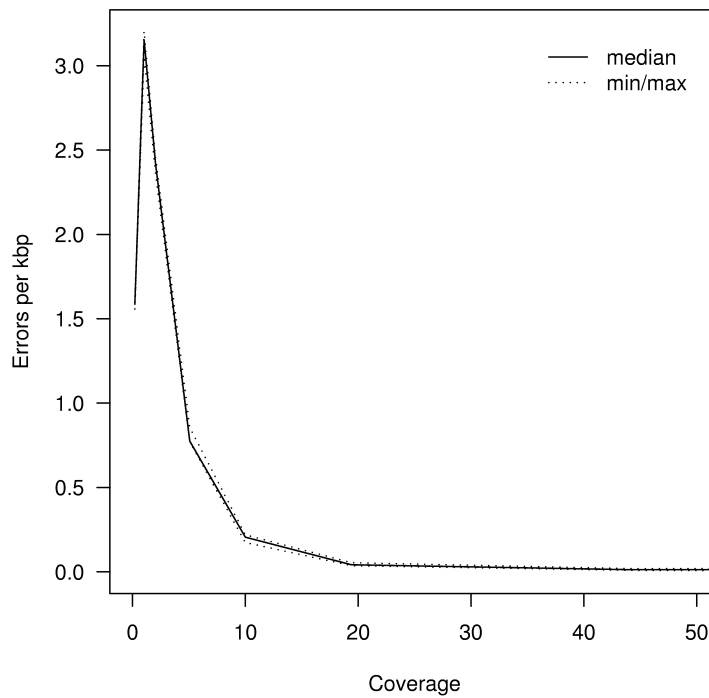

Supplement: gkn425_3.pdf [file gkn425_3.pdf]
