# Supplementary material for: Substantial biases in ultra-short read data sets from high-throughput DNA sequencing
Source: PubMed Central journal article supplement — Nucleic Acids Res. 2008 Jul 26;36(16):e105. doi: 10.1093/nar/gkn425 (PMC2532726; doi:10.1093/nar/gkn425), 2008-07-26

### Supplementary Figure 3

Heatmaps illustrating error positions in Solexa reads containing two errors. Frequent error position combinations are shown in black, rare combinations in gray shades. The color bar at the bottom indicates gray shades and frequencies. For the *Beta* data set (a) and for the *Helicobacter* data set (b) we observe cumulations of errors towards the end and the beginning of the reads.

a)

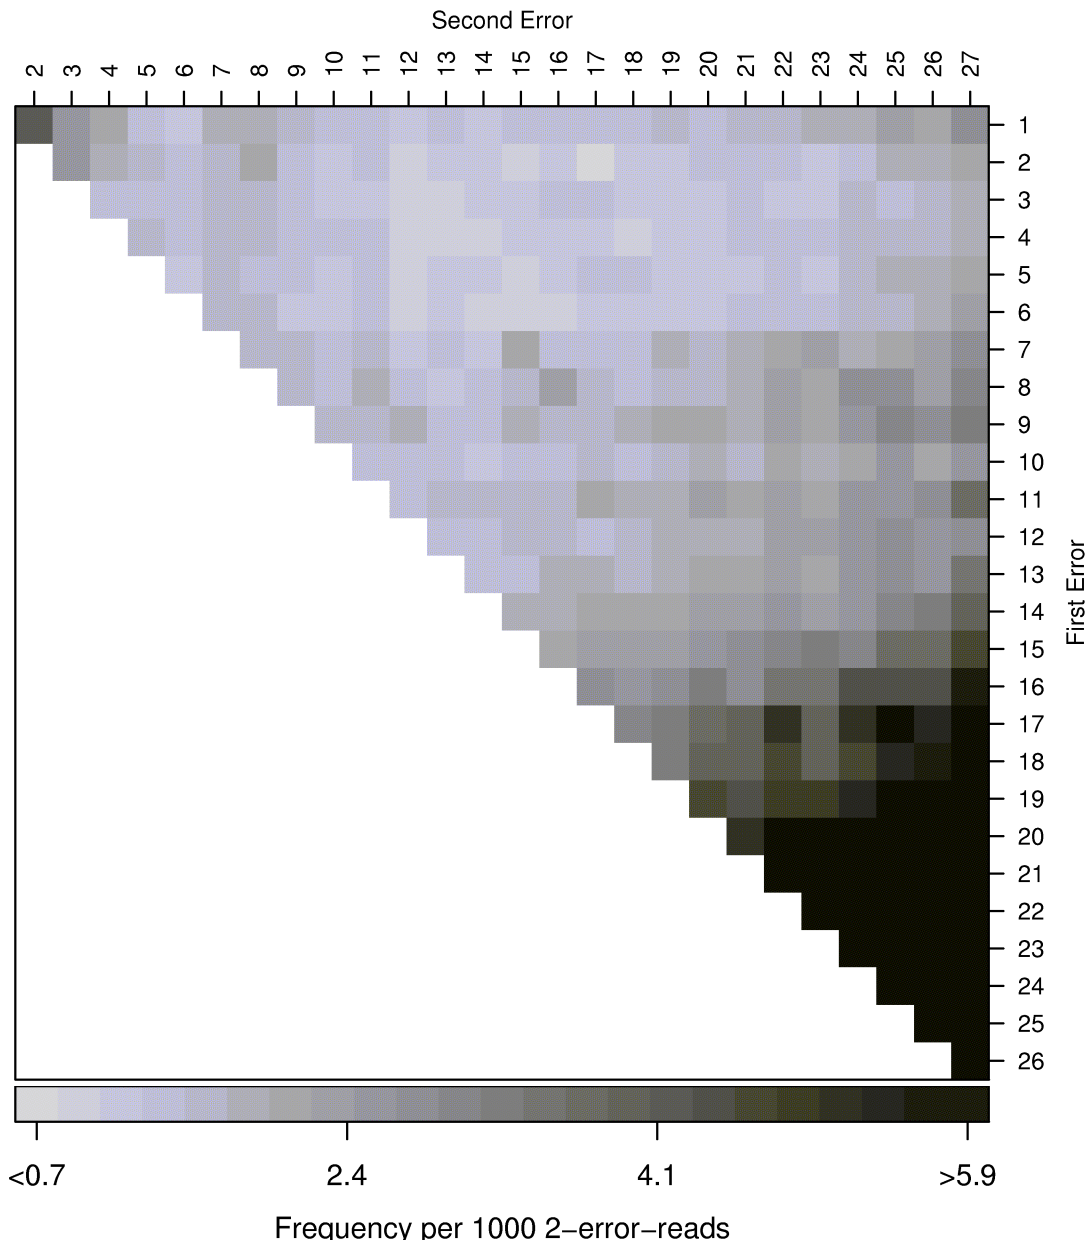

b)

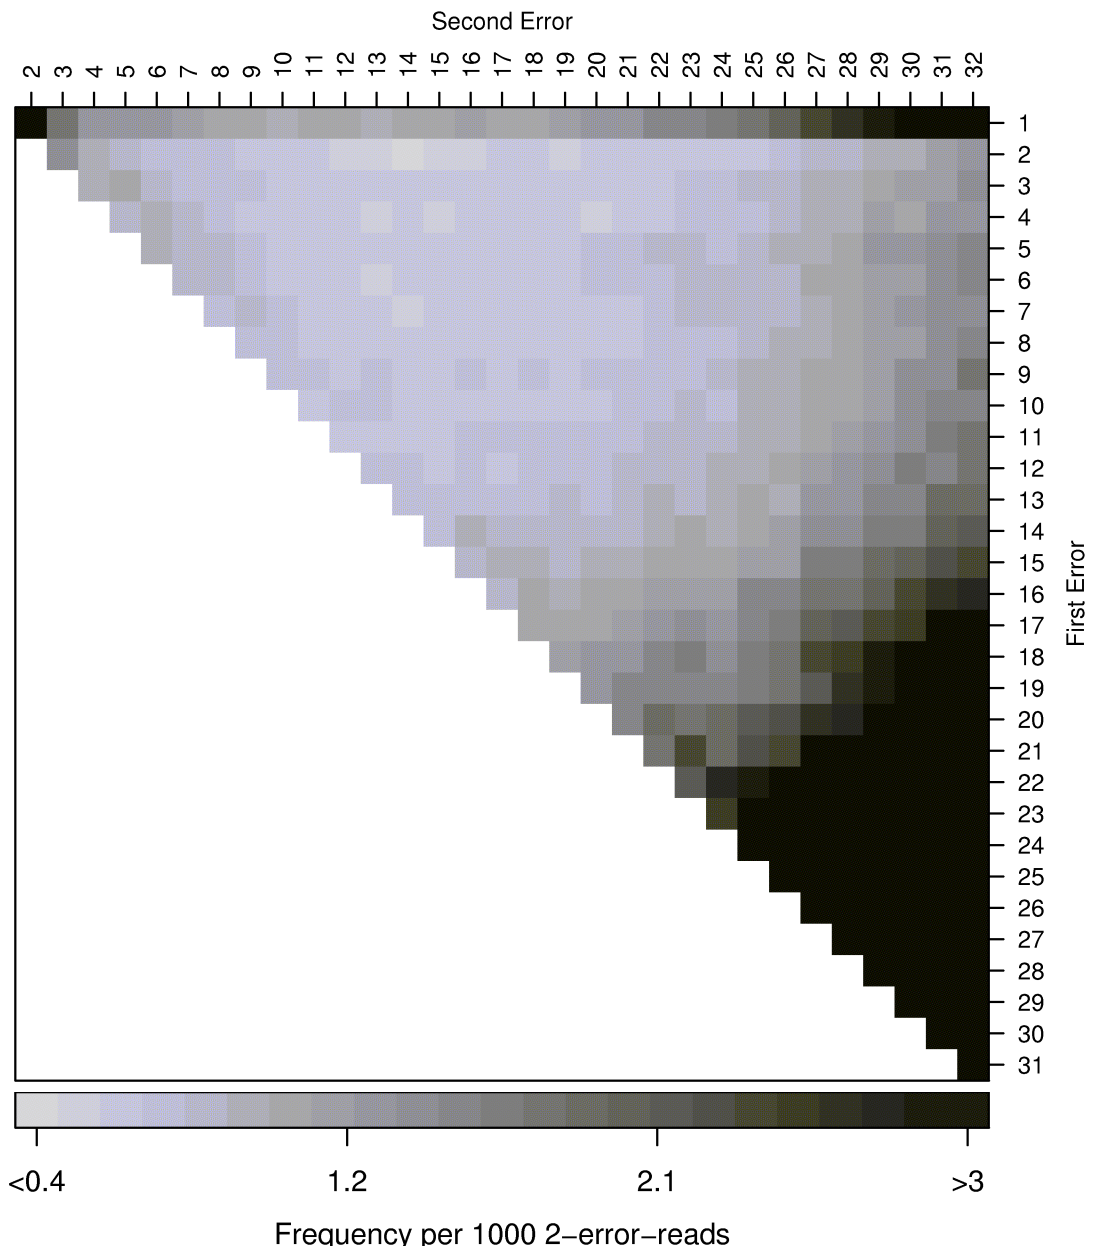

Supplement: gkn425_4.pdf [file gkn425_4.pdf]
