# Supplementary material for: Substantial biases in ultra-short read data sets from high-throughput DNA sequencing
Source: PubMed Central journal article supplement — Nucleic Acids Res. 2008 Jul 26;36(16):e105. doi: 10.1093/nar/gkn425 (PMC2532726; doi:10.1093/nar/gkn425), 2008-07-26

Supplementary Figure 4:

Independency between error positions in reads containing two errors. Dots in this scatter plot represent combinations of error positions in reads containing two errors. The plot relates expected versus observed frequencies of position combinations among two-error-reads. The expected frequencies are computed based on the position specific error probabilities assuming independence between base calls. The diagonal represents equivalence between observed and expected frequencies. The figure shows that observed frequencies confirm the independence assumption in the *Beta* data set (a) as well as in the *Helicobacter* data set (b).

a)

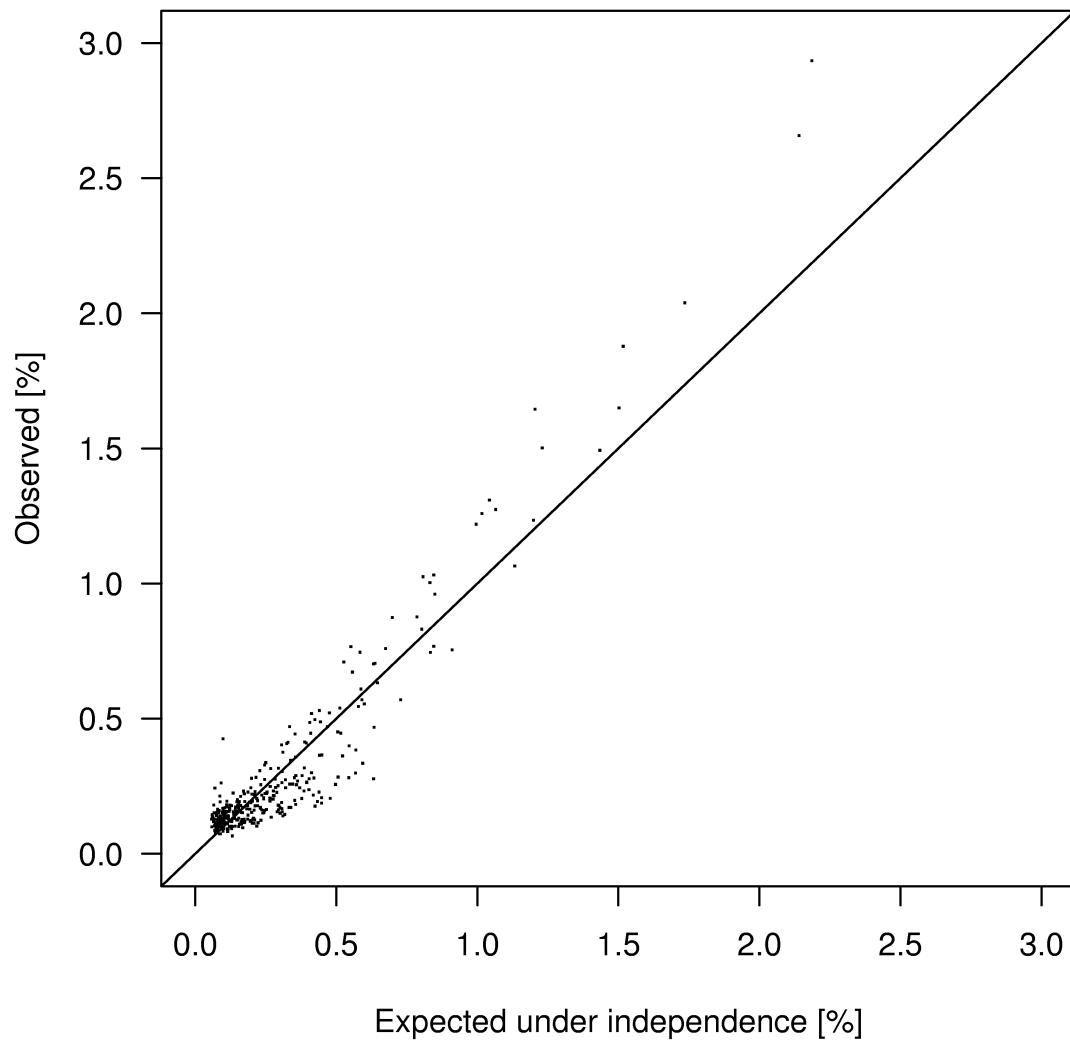

b)

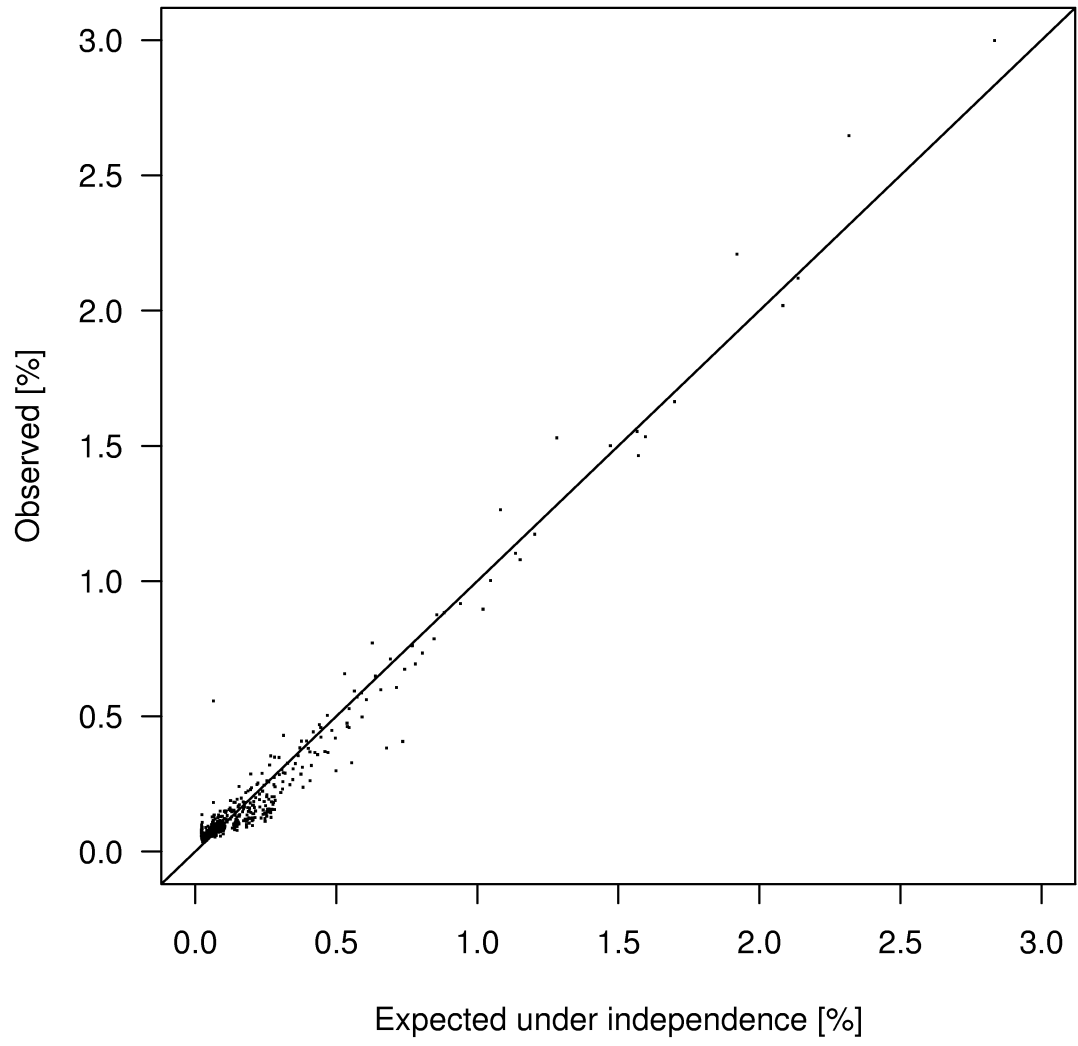

Supplement: gkn425_5.pdf [file gkn425_5.pdf]
