# Supplementary material for: Substantial biases in ultra-short read data sets from high-throughput DNA sequencing
Source: PubMed Central journal article supplement — Nucleic Acids Res. 2008 Jul 26;36(16):e105. doi: 10.1093/nar/gkn425 (PMC2532726; doi:10.1093/nar/gkn425), 2008-07-26

Supplementary Figure 5:

Sequence context of wrong base calls in Solexa reads from *Helicobacter acinonychis* and *Beta vulgaris*, considering two bases upstream and downstream of the wrong base calls. An “e” indicates the substituted base. The scatterplot shows the correlation of the relative frequencies (relating the frequency of 5-tuples at error positions to the frequency of all 5-tuples in the reads) for the two data sets.

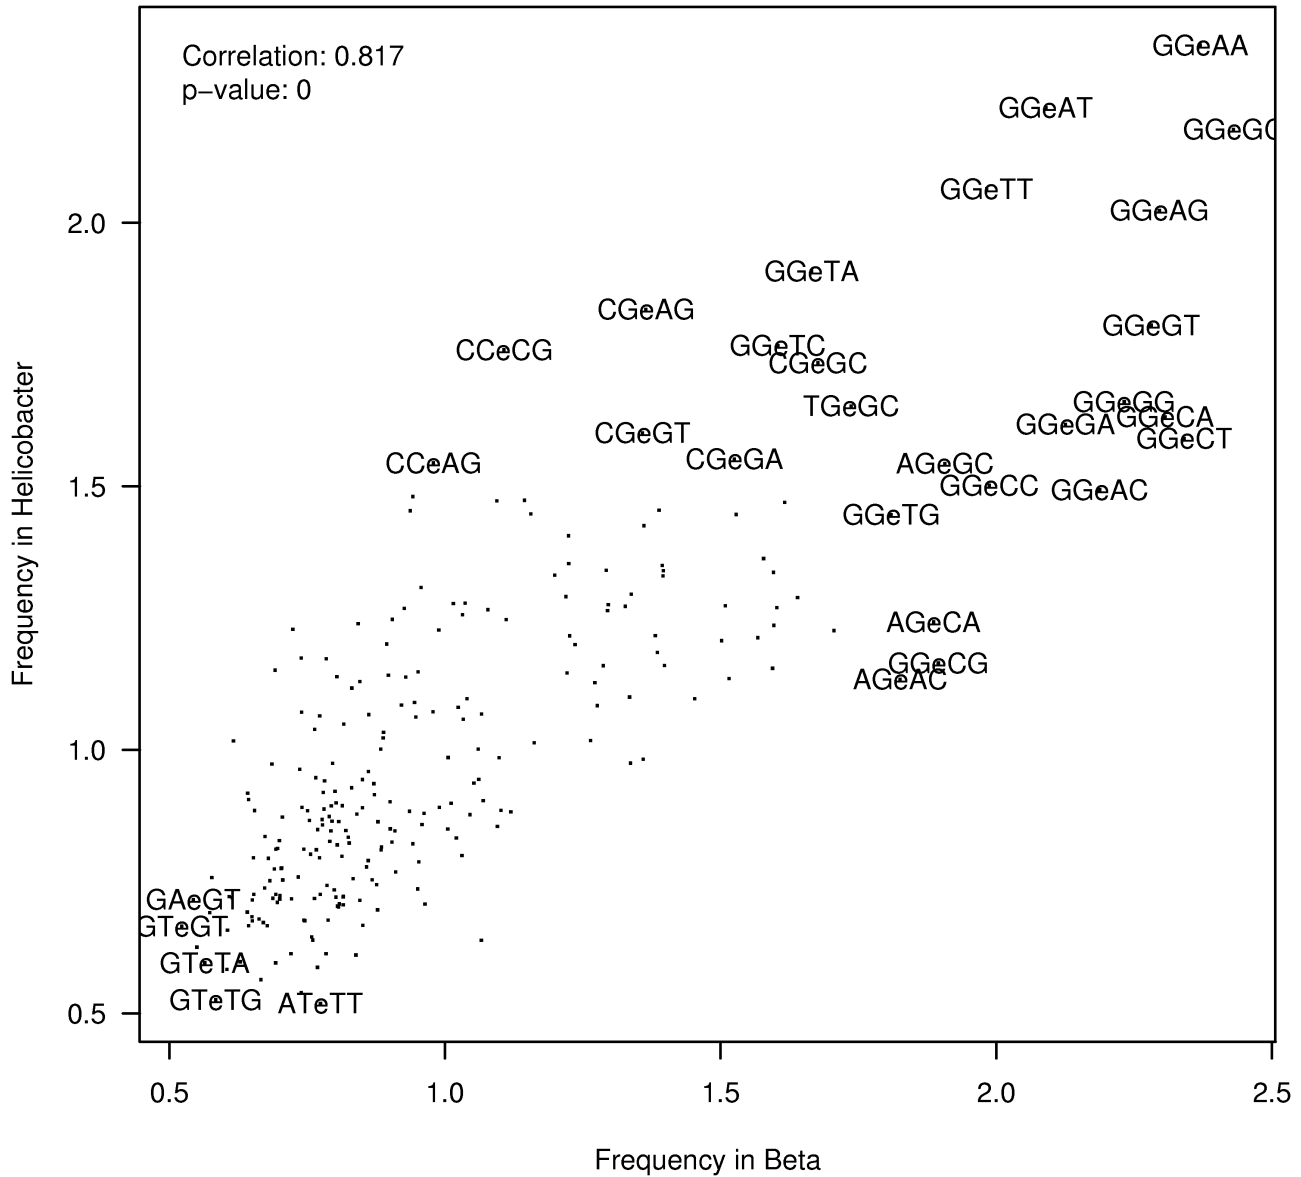

Supplement: gkn425_6.pdf [file gkn425_6.pdf]
