# Supplementary material for: Substantial biases in ultra-short read data sets from high-throughput DNA sequencing
Source: PubMed Central journal article supplement — Nucleic Acids Res. 2008 Jul 26;36(16):e105. doi: 10.1093/nar/gkn425 (PMC2532726; doi:10.1093/nar/gkn425), 2008-07-26
Supplement: gkn425_7.pdf [file gkn425_7.pdf]

### Supplementary Table 1

Number and lengths of “gaps” (positions in a row that are no read start positions) based on ELAND U0, U1, U2, R0 matched reads and reads with single indels.

| Length | Number   |      |
|--------|----------|------|
|        | Helicob. | Beta |
| 1      | 45945    | 217  |
| 2      | 6584     | 23   |
| 3      | 1674     | 3    |
| 4      | 505      | 1    |
| 5      | 167      |      |
| 6      | 109      |      |
| 7      | 65       |      |
| 8      | 17       |      |
| 9      | 9        |      |
| 10     | 29       |      |
| 11     | 5        |      |
| 13     | 4        |      |
| 14     | 2        |      |
| 15     | 1        |      |
| 16     | 1        |      |
| 21     | 1        |      |
| Total  | 55118    | 244  |
